# Supplementary material for: The Exploring Functional Role of Ammonium Transporters of Aspergillus oryzae in Nitrogen Metabolism: Challenges towards Cell Biomass Production
Source: MDPI journal article supplement (doi:10.3390/ijms23147567), 2022-07-08
Supplement: s1 [file s1]

## Supplementary materials

### **The Exploring Functional Role of Ammonium Transporters of *Aspergillus oryzae* in Nitrogen Metabolism: Challenges towards Cell Biomass Production**

**Chanikul Chutrakul <sup>1,\*</sup>, Sarocha Panchanawaporn <sup>1</sup>, Tayvich Vorapreeda <sup>2</sup>, Sukanya Jeennor <sup>1</sup>, Jutamas Anantayanon <sup>1</sup> and Kobkul Laoteng <sup>1</sup>**

<sup>1</sup> Functional Ingredients and Food Innovation Research Group (FIGI), National Center for Genetic Engineering and Biotechnology (BIOTEC), National Science and Technology Development Agency (NSTDA), Thailand Science Park, Phahonyothin Road, Khlong Nueng, Khlong Luang, Pathum Thani 12120, Thailand; chanikul@biotec.or.th (C.C.), sarocha.pan@biotec.or.th (S.P.), sukanya.jee@biotec.or.th (S.J.), jutamas.ana@biotec.or.th (J.A.), kobkul@biotec.or.th (K.L.)

<sup>2</sup> Biochemical Engineering and Systems Biology Research Group (IBEG), National Center for Genetic Engineering and Biotechnology (BIOTEC), National Science and Technology Development Agency (NSTDA), at King Mongkut's University of Technology Thonburi, Bangkok 10150, Thailand; tayvich.vor@biotec.or.th

\* Correspondence: chanikul@biotec.or.th; Tel.: +66-25646700 Ext. 3769

(A)

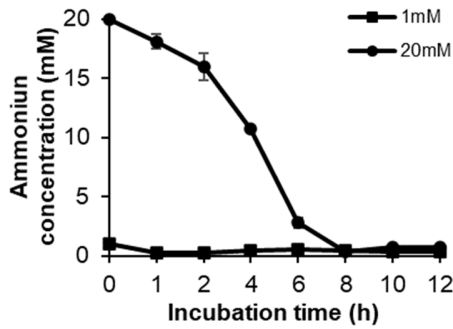

(B)

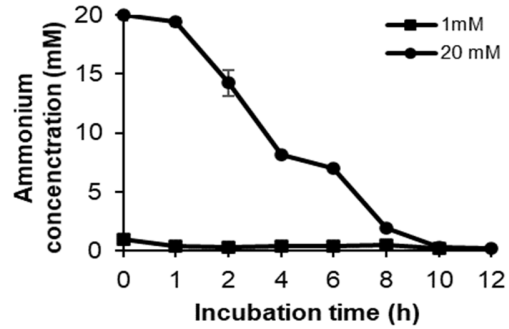

(C)

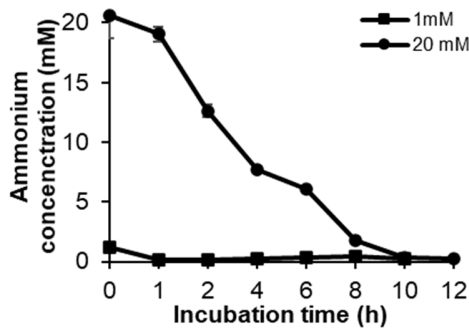

(D)

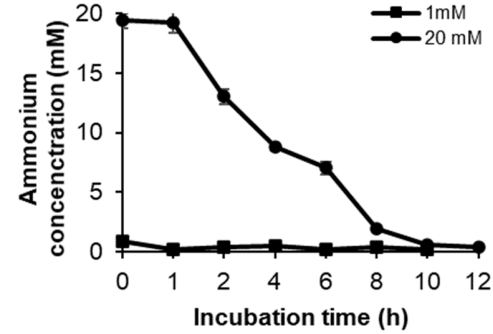

(E)

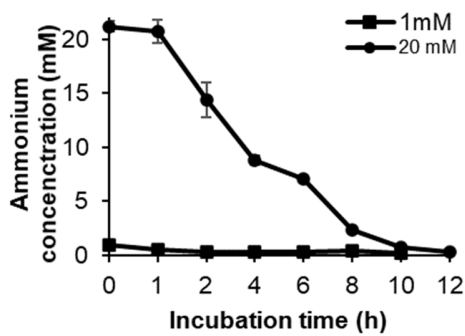

(F)

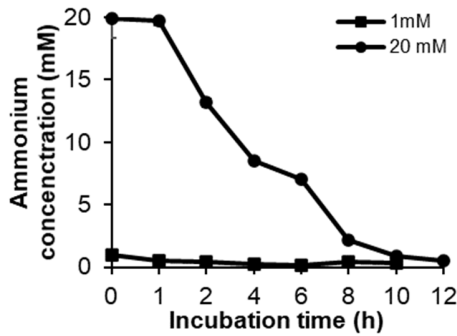

**Figure S1.** Residual ammonium concentration in the *A. oryzae* cultures. The spore suspension was inoculated in modified Czapek Dox (mCD) broth medium for 16 h, and prolonged cultivation for 4 h in nitrogen-free mCD was carried out before transferring the cultures into 1 or 20 mM  $\text{NH}_4\text{Cl}$ -containing medium. Culture samples of wild-type (A), AoT16 (B),  $\Delta\text{aoamt2}$  (C),  $\text{oeaamt2}$  (D),  $\Delta\text{aoamt3}$  (E), and  $\text{oeaamt3}$  (F) were collected at different time points to measure the ammonium concentration. Experiments were carried out in triplicates.

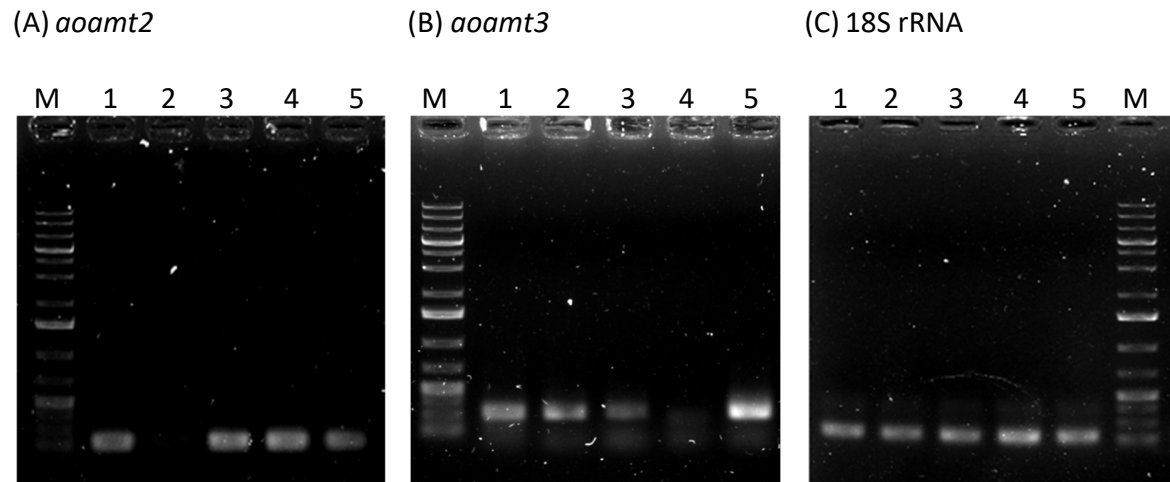

**Figure S2.** Verification of deletion of *aoamt2* and *aoamt3* in *A. oryzae* disruptant strains. Detection of *aoamt2* (A) and *aoamt3* (B) genes was performed by RT-PCR. Total RNA templates were prepared from the cultures of the recipient (AoT16) (lane 1),  $\Delta$ *aoamt2* (lane 2), *oeaoamt2* (lane 3),  $\Delta$ *aoamt3* (lane 4), and *oeaoamt3* (lane 5) strains grown in SM medium for 24 h. Lane M is 1 kb DNA plus ladder (Thermo Fisher Scientific).

(A)

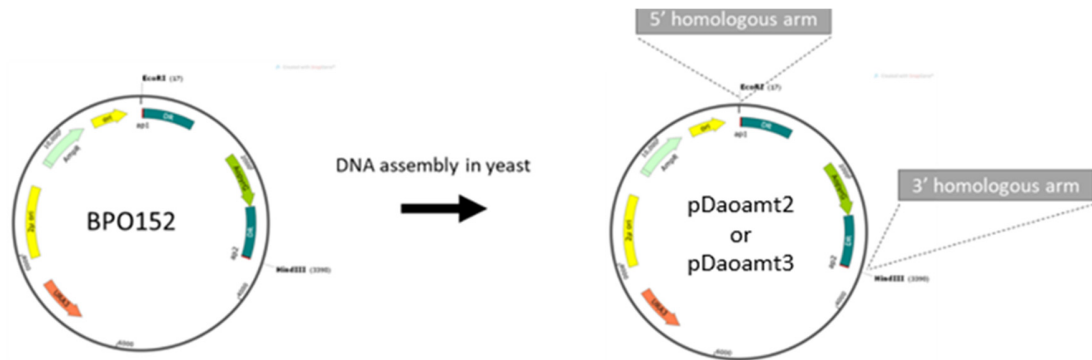

(B)

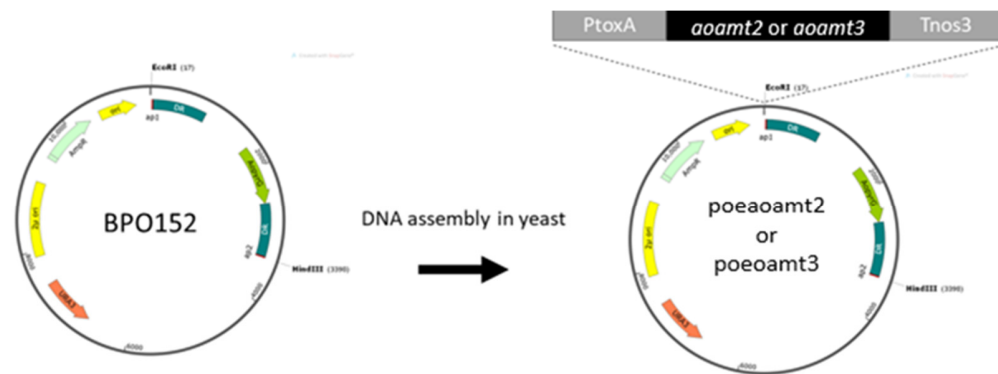

**Figure S3.** Schematic construction of plasmids for disruption and overexpression of *aoamt* gene in *A. oryzae*. (A) The pDaoamt2 or pDaoamt2 disrupted plasmid containing the *aoamrG* marker cassette with 5' and 3' homologous fragments for targeted recombination with individual *aoamt* genes. (B) The poeaoamt2 or poeaoamt3 overexpression plasmids containing the expression cassette of individual *aoamt* genes.

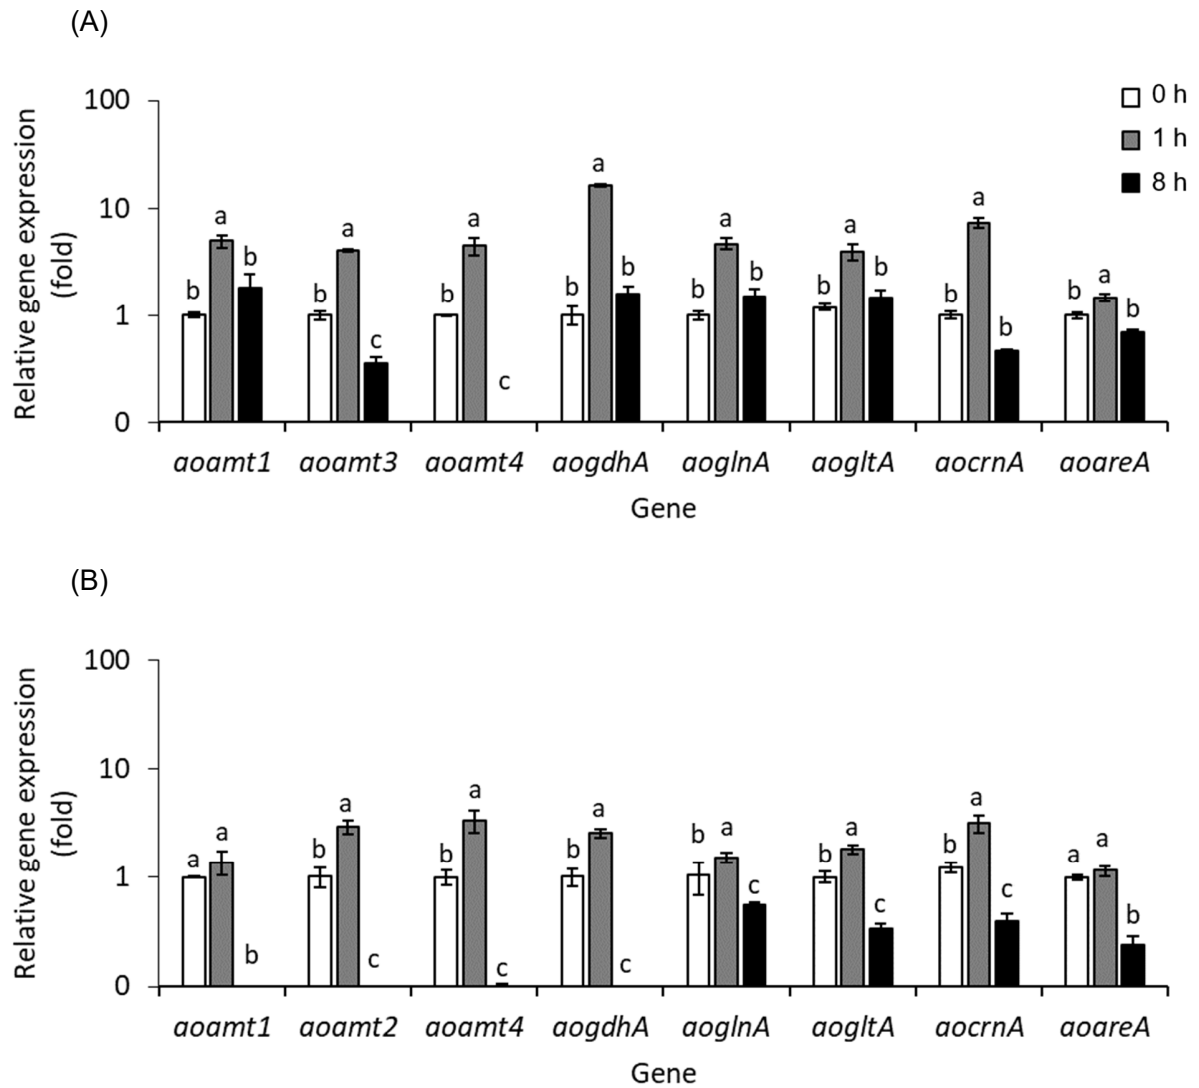

**Figure S4.** Expression analysis of a set of genes in disrupted strains at different cultivation times by RT-qPCR. Relative expression levels of *aoamt1-4*, *aogdhA*, *aoglnA*, *aogltA*, *aocrnA*, and *aoareA* of  $\Delta$ aoamt2 (A) and  $\Delta$ aoamt3 (B) strains grown in 1 mM  $\text{NH}_4\text{Cl}$ -containing medium are illustrated. Total RNA was extracted from the cultures after transferring them to a 1 mM  $\text{NH}_4\text{Cl}$ -containing medium for 0, 1, and 8 h. The expression level of each gene at 0 h (white bars) is adjusted to 1. Different letters (a, b, and c) above the bars indicate a statistically significant difference in the transcript levels of each gene at various time points, analyzed by Duncan's multiple range test (MRT) ( $p$ -value < 0.05). The mean  $\pm$  standard deviation (mean  $\pm$  SD) of the relative expression level analyzed in triplicates is presented.

**Table S1. Specific oligonucleotide primers used for cDNA cloning of ammonium transporter genes of *A. oryzae***

| Gene          | Sense primer name | Sequence (5' to 3')          | Antisense primer name | Sequence (5' to 3')               |
|---------------|-------------------|------------------------------|-----------------------|-----------------------------------|
| <i>aoamt1</i> | Aoamt1_F          | ATGTCGGACATCAAGGCG<br>CCCTTC | Aoamt1_R              | TTACTGTGTTTTCTCATCCT<br>CCTCGACAC |
| <i>aoamt2</i> | Aoamt2_F          | ATGGCAGAATACCCTGTG<br>GCCTAC | Aoamt2_R              | CTAAGCCTTGGCCTCTATG<br>GTCGTTTC   |
| <i>aoamt3</i> | Aoamt3_F          | ATGGTCGCGCCGGTGTAC<br>AATGC  | Aoamt3_R              | CTAGACTCCTGGTGTTTTCA<br>CTGTTTGC  |
| <i>aoamt4</i> | Aoamt4_F          | ATGTCTGTCCAGGCTGCCT<br>GGGAG | Aoamt4_R              | CTAAAGCCGAACACCCTCA<br>AAAGGATG   |

**Table S2. Overlapping primers used for recombinant plasmid construction by PCR**

| Plasmid   | Amplified fragment | Sense primer name | Sequence (5' to 3')                                                 | Antisense primer name | Sequence (5' to 3')                                                     |
|-----------|--------------------|-------------------|---------------------------------------------------------------------|-----------------------|-------------------------------------------------------------------------|
| pDaoamt2  | 5'HR_aoamt2        | 5'HR-Aoamt2-F     | GGCCGATTTCATTCCC<br>GGAAGGCGCGCCGT<br>CAATGGAGAGTGAT<br>TGATCAG     | 5'HR-Aoamt2-R         | GGTACCTAGCTAGT<br>TAGCAAGAATTCA<br>CTGTGGCTGTCGTT<br>GAACAACG           |
|           | 3'HR_aoamt2        | 3'HR-Aoamt2-F     | AAGTACCTACGTAC<br>GTACGGACTTAAGCT<br>TCAGGAAGCGTCTA<br>GTTGAAGACC   | 3'HR-Aoamt2-R         | TTGTAAAACGGCG<br>GGATCGCGGCGCG<br>CCTAGGTAATCGTA<br>GGATGTCGC           |
| pDaoamt3  | 5'HR_aoamt3        | 5'HR-Aoamt3-F     | GGCCGATTTCATTCCC<br>GGCGATCGCCTGTCT<br>TGCCATTCTTGGTGA<br>C         | 5'HR-Aoamt3-R         | CGAATTCGTTTTGC<br>TGGCCGCATCTGAC<br>CATGGCGAGCAGG<br>CTCACTCTG          |
|           | 3'HR_aoamt3        | 3'HR-Aoamt3-F     | AAGTACCTACGTAC<br>GTACGGACTTAAGCT<br>TGTCTAGCGGTCGTG<br>TTCGAATTAGG | 3'HR-Aoamt3-R         | GATCCCCGGGTACC<br>GAGCTCGCGATCG<br>CCAATCAGGCAAC<br>AAGAAGTCGG          |
| poeaoamt2 | PtoxA              | PtoxA-Aoamt2-F    | ACCCTACGTATCCAG<br>ATGAGCGGGTGGTA<br>TCGATTGGAATGCAT<br>GGAGGA      | PtoxA-Aoamt2-R        | TGTAGGCCACAGG<br>GTATTCTGCCATGA<br>CCTATATTCATTCA<br>TTGTCAGCT          |
|           | aoamt2             | Aoamt2-F          | AGCTGACAATGAAT<br>GAATATAGGTCATG<br>GCAGAATACCCTGT<br>GGCCTACA      | Aoamt2-R              | GTTTGAACGATCTG<br>CAGCCGGGCGGCT<br>AAGCCTTGGCCTCT<br>ATGGTCGTT          |
|           | Tnos3              | Tnos3-Aoamt2-F    | AACGACCATAGAGG<br>CCAAGGCTTAGCCG<br>CCCGGCTGCAGATC<br>GTTCAAAC      | Tnos3-Aoamt2-R        | GTAAAACGACGGC<br>GGATCGCAAGCT<br>TAATTAATTCTCAT<br>GTTTGACAGCTTAT<br>CA |
| poeaoamt3 | PtoxA              | PtoxA-Aoamt3-F    | ACCCTACGTATCCAG<br>ATGAGCGGGTGGTA<br>TCGATTGGAATGCAT<br>GGAGGA      | PtoxA-Aoamt3-R        | GAAGCATTGTACA<br>CCGGCGCGACCAT<br>GACCTATATTCATT<br>CATTGTCAGCT         |
|           | aoamt3             | Aoamt3-F          | AGCTGACAATGAAT<br>GAATATAGGTCATG<br>GTCGCGCCGGTGATC<br>AATGCTTC     | Aoamt3-R              | GTTTGAACGATCTG<br>CAGCCGGGCGGCT<br>AGACTCCTGGTGTT<br>TTCCTGTT           |
|           | Tnos3              | Tnos3-Aoamt3-F    | AACAGTGAACACAC<br>CAGGAGTCTAGCCG<br>CCCGGCTGCAGATC<br>GTTCAAAC      | Tnos3-Aoamt3-R        | GTAAAACGACGGC<br>GGATCGCAAGCT<br>TAATTAATTCTCAT<br>GTTTGACAGCTTAT<br>CA |

**Table S3. Specific oligonucleotide primers used for RT-qPCR**

| <b>Gene</b>   | <b>Sense primer name</b> | <b>Sequence (5' to 3')</b>      | <b>Antisense primer name</b> | <b>Sequence (5' to 3')</b>     |
|---------------|--------------------------|---------------------------------|------------------------------|--------------------------------|
| <i>aoamt1</i> | Aoamt1_RT_F              | TATGCGTCTTACAACGTG<br>GACTGGAGC | Aoamt1_RT_R                  | TACCATTGGAACGTGA<br>CGACAGAG   |
| <i>aoamt2</i> | Aoamt2_RT_F              | TCCTGGGTGCGCCATCT<br>GTTGGCA    | Aoamt2_RT_R                  | GCTCGAGTTCCAGGTC<br>CAGCATGC   |
| <i>aoamt3</i> | Aoamt3_RT_F              | GGATCGCCTTCCTCTAC<br>AG         | Aoamt3_RT_R                  | GCTGGAATAGGCAGA<br>AGACG       |
| <i>aoamt4</i> | Aoamt4_RT_F              | CATATTGGCGTCCTTGC<br>TGAACCG    | Aoamt4_RT_R                  | AAGCCATTCTCTGACC<br>AGACCATGTG |
| <i>aogdhA</i> | AogdhA_RT_F              | ATGTCCAACCTTCCCAT<br>TGAGC      | AogdhA_RT_R                  | AGCGGAGTTGAACTG<br>AACACG      |
| <i>aoglnA</i> | AoglnA_RT_F              | CTACCGTGCTTGCTTGT<br>ACGC       | AoglnA_RT_R                  | GGCGACGGTGGAGAC<br>GTTGC       |
| <i>aogltA</i> | AogltA_RT_F              | CAAGGATATGGCTGGG<br>CTAATAC     | AogltA_RT_R                  | CGTCATCACACCGGCA<br>CCATC      |
| <i>aocrnA</i> | AocrnA_RT_F              | GTCCCTTGCCAAGTCTG<br>GTGTAC     | AocrnA_RT_R                  | TCCTGTTGGGGTGTCT<br>TCGC       |
| <i>aoareA</i> | AoareA_RT_F              | TGCCCCAACCAGGAGCG<br>TATGG      | AoareA_RT_R                  | AATCTTGACGGCACTG<br>GGCGAG     |
| 18S<br>rRNA   | 18S rRNA_RT_F            | GTAACCCGTTGAACCCC<br>ATT        | 18S rRNA_RT_R                | CCATCCAATCGGTAGT<br>AGCG       |
